# Supplementary material for: Factors Associated with Increased Analgesic Use in German Women with Endometriosis during the COVID-19 Pandemic
Source: MDPI journal article supplement (doi:10.3390/jcm11195520), 2022-09-21
Supplement: s1 [file s1]

**Table S1. Differences between participants who did not complete (group “Non-respondents”) versus those who completed the questions regarding analgesic intake (group “Respondents”).**

| Variables                                                                                                                    | Values                                                            | Non-respondents                            | Respondents                                | p-value            |
|------------------------------------------------------------------------------------------------------------------------------|-------------------------------------------------------------------|--------------------------------------------|--------------------------------------------|--------------------|
| <b>Demographic variables</b>                                                                                                 |                                                                   |                                            |                                            |                    |
| <b>Age</b>                                                                                                                   | M (SD); N<br>Mdn (IQR)                                            | 32.36 (6.85); 115<br>32.00 (27.00 – 37.00) | 31.97 (7.13); 278<br>31.00 (26.00 – 36.00) | 0.588 <sup>2</sup> |
| <b>Having a stable relationship</b>                                                                                          | No in % (n/N)<br>Yes in % (n/N)                                   | 72.3% (73/101)<br>27.7% (28/101)           | 77.7% (216/278)<br>22.3% (62/278)          | 0.273 <sup>1</sup> |
| <b>Living alone</b>                                                                                                          | No in % (n/N)<br>Yes in % (n/N)                                   | 74.1% (86/116)<br>25.9% (30/116)           | 79.8% (221/277)<br>20.2% (56/276)          | 0.217 <sup>1</sup> |
| <b>Educational level</b>                                                                                                     | Up to secondary level in % (n/N)<br>Tertiary level in % (n/N)     | 50% (1/2)<br>50% (1/2)                     | 29.2% (78/267)<br>70.5% (189/267)          | 0.502 <sup>3</sup> |
| <b>Pandemic-specific variables</b>                                                                                           |                                                                   |                                            |                                            |                    |
| <b>Duration of i/q</b>                                                                                                       | M (SD); N<br>Mdn (IQR)                                            | 24.80 (13.48)<br>21.00 (20.00-30.00)       | 27.76 (11.92)<br>27.00 (21.00-32.00)       | 0.004 <sup>2</sup> |
| <b>Duration of i/q</b>                                                                                                       | <15d in % (n/N)<br>≥15d in % (n/N)                                | 17.0% (17/100)<br>83.0% (83/100)           | 10.1% (28/278)<br>89.9% (250/278)          | 0.067 <sup>1</sup> |
| <b>Being in i/q</b>                                                                                                          | No in % (n/N)<br>Yes in % (n/N)                                   | 6.1% (7/115)<br>93.9% (108/115)            | 2.5% (7/278)<br>97.5% (271/278)            | 0.082 <sup>1</sup> |
| <b>Reduction in social network</b>                                                                                           | No to moderate reduction in % (n/N)<br>Large reduction in % (n/N) | 32.7% (33/101)<br>67.3% (68/101)           | 27.0% (75/278)<br>73.0% (203/278)          | 0.278 <sup>1</sup> |
| <b>Perceived reduction in social support regarding pain experience during social isolation (by partner/ family/ friends)</b> | No in % (n/N)<br>Yes in % (n/N)                                   | 100.0% (1/1)<br>0.0% (0/1)                 | 61.2% (169/276)<br>38.8% (107/276)         | 0.427 <sup>1</sup> |
| <b>Endometriosis-specific variables</b>                                                                                      |                                                                   |                                            |                                            |                    |
| <b>Time since diagnosis (y)</b>                                                                                              | M (SD); N<br>Mdn (IQR)                                            | 4.07 (4.76); 94<br>2.00 (1.00 – 5.00)      | 4.37 (4.79); 277<br>3.00 (1.00 – 5.00)     | 0.360 <sup>2</sup> |
| <b>Age at diagnosis (y)</b>                                                                                                  | M (SD); N<br>Mdn (IQR)                                            | 28.26 (6.71); 94<br>28.50 (24.00 – 33.00)  | 27.62 (6.25); 277<br>27.00 (23.00 – 32.50) | 0.268 <sup>2</sup> |
| <b>Time since pain onset (y)</b>                                                                                             | M (SD); N<br>Mdn (IQR)                                            | 13.28 (7.59); 96<br>12.00 (7.00 – 18.50)   | 14.00 (7.88); 278<br>13.00 (8.00 – 20.00)  | 0.470 <sup>2</sup> |
| <b>Diagnostic delay (y)</b>                                                                                                  | M (SD); N<br>Mdn (IQR)                                            | 9.31 (6.86); 94<br>9.00 (5.00 – 14.00)     | 9.65 (6.91); 277<br>9.00 (4.50 – 14.00)    | 0.844 <sup>2</sup> |
| <b>Pain characteristics</b>                                                                                                  | Pain peaks in % (n/N)<br>Continuous pain in % (n/N)               | 64.2% (61/95)<br>35.8% (34/95)             | 65.1% (181/278)<br>34.9% (97/278)          | 0.874 <sup>1</sup> |

|                                       |                           |                                            |                                             |                    |
|---------------------------------------|---------------------------|--------------------------------------------|---------------------------------------------|--------------------|
| <b>Number of pain localizations</b>   | M (SD); N<br>Mdn (IQR)    | 5.18 (0.95); 38<br>5.00 (5.00 – 6.00)      | 5.05 (1.15); 277<br>5.00 (5.00 – 6.00)      | 0.784 <sup>2</sup> |
| <b>Pain intensity</b>                 |                           |                                            |                                             |                    |
| <b>Dysmenorrhea prior to i/q</b>      | M (SD); N<br>Mdn (IQR)    | 63.58 (32.35); 36<br>72.50 (45.00 – 91.50) | 65.25 (31.21); 248<br>73.50 (46.50 – 90.00) | 0.813 <sup>2</sup> |
| <b>Non-cyclical pain prior to i/q</b> | M (SD); N<br>Median (IQR) | 45.58 (31.02); 38<br>41.00 (20.00 – 71.00) | 51.89 (26.64); 265<br>51.00 (32.00 – 72.00) | 0.163 <sup>2</sup> |
| <b>Dyspareunia prior to i/q</b>       | M (SD); N<br>Mdn (IQR)    | 39.56 (33.06); 32<br>30.50 (10.00 – 64.50) | 45.07 (32.53); 252<br>45.50 (14.50 – 69.00) | 0.391 <sup>2</sup> |
| <b>Dysuria prior i/q</b>              | M (SD); N<br>Mdn (IQR)    | 26.94 (32.56); 32<br>9.50 (3.00 – 47.50)   | 28.97 (28.95); 247<br>20.00 (3.00 – 48.00)  | 0.488 <sup>2</sup> |
| <b>Dyschezia prior to i/q</b>         | M (SD); N<br>Mdn (IQR)    | 36.35 (30.31); 34<br>26.50 (10.00 – 58.00) | 41.07 (31.17); 259<br>37.00 (13.00 – 68.00) | 0.414 <sup>2</sup> |
| <b>Lower back pain prior to i/q</b>   | M (SD); N<br>Mdn (IQR)    | 54.84 (32.38); 37<br>48.00 (33.00 – 89.00) | 57.69 (32.42); 270<br>60.00 (33.00 – 88.00) | 0.529 <sup>2</sup> |
| <b>Current dysmenorrhea</b>           | M (SD); N<br>Mdn (IQR)    | 32.75 (41.36); 4<br>22.50 (0.00 – 65.50)   | 60.25 (33.63); 253<br>70.00 (30.00 – 87.00) | 0.118 <sup>2</sup> |
| <b>Current non-cyclical pain</b>      | M (SD); N<br>Mdn (IQR)    | 38.33 (42.11); 6<br>21.00 (5.00 – 82.00)   | 52.79 (30.02); 268<br>56.00 (28.50 – 77.50) | 0.295 <sup>2</sup> |
| <b>Current dyspareunia</b>            | M (SD); N<br>Mdn (IQR)    | 44.50 (43.61); 4<br>46.50 (7.00 – 82.00)   | 44.03 (35.41); 253<br>45.00 (8.00 – 73.00)  | 0.938 <sup>2</sup> |
| <b>Current dysuria</b>                | M (SD); N<br>Mdn (IQR)    | 4.67 (35.63); 3<br>3.00 (1.00 – 10.00)     | 29.47 (31.04); 253<br>16.00 (2.00 – 51.00)  | 0.249 <sup>2</sup> |
| <b>Current dyschezia</b>              | M (SD); N<br>Mdn (IQR)    | 21.67 (35.81); 3<br>2.00 (0.00 – 63.00)    | 40.37 (32.33); 258<br>37.00 (10.00 – 67.00) | 0.217 <sup>2</sup> |
| <b>Current lower back pain</b>        | M (SD); N<br>Mdn (IQR)    | 34.40 (23.46); 5<br>24.00 (20.00 – 34.00)  | 58.85 (34.11); 266<br>64.50 (29.00 – 89.00) | 0.110 <sup>2</sup> |
| <b>Pain-induced disability</b>        |                           |                                            |                                             |                    |
| <b>Family prior to i/q</b>            | M (SD); N<br>Mdn (IQR)    | 5.78 (2.33); 36<br>6.00 (5.00 – 8.00)      | 5.12 (2.48); 278<br>5.00 (3.00 – 7.00)      | 0.154 <sup>2</sup> |
| <b>Recreational prior to i/q</b>      | M (SD); N<br>Mdn (IQR)    | 5.75 (2.52); 36<br>6.00 (4.00 – 8.00)      | 5.57 (2.57); 278<br>6.00 (4.00 – 8.00)      | 0.705 <sup>2</sup> |
| <b>Social activities prior to i/q</b> | M (SD); N<br>Mdn (IQR)    | 5.86 (2.90); 36<br>6.00 (3.00 – 8.00)      | 5.42 (2.72); 278<br>6.00 (3.00 – 8.00)      | 0.324 <sup>2</sup> |
| <b>Occupational prior to i/q</b>      | M (SD); N<br>Mdn (IQR)    | 6.50 (2.68); 36<br>7.00 (4.00 – 8.50)      | 5.97 (2.80); 278<br>6.00 (4.00 – 8.00)      | 0.306 <sup>2</sup> |
| <b>Sexuality prior to i/q</b>         | M (SD); N<br>Mdn (IQR)    | 6.20 (3.27); 35<br>7.00 (3.00 – 9.00)      | 6.00 (3.26); 278<br>7.00 (3.00 – 9.00)      | 0.721 <sup>2</sup> |
| <b>Self-care prior to i/q</b>         | M (SD); N                 | 2.72 (3.16); 36                            | 2.74 (2.77); 278                            | 0.698 <sup>2</sup> |

|                                              |                        |                                            |                                             |                          |
|----------------------------------------------|------------------------|--------------------------------------------|---------------------------------------------|--------------------------|
|                                              | Mdn (IQR)              | 1.00 (0.00 – 5.00)                         | 2.00 (0.00 – 5.00)                          |                          |
| <b>Life support prior to i/q</b>             | M (SD); N<br>Mdn (IQR) | 2.64 (2.95); 36<br>2.00 (0.00 – 5.00)      | 2.68 (2.61); 278<br>2.00 (0.00 – 5.00)      | 0.583 <sup>2</sup>       |
| <b>Discretionary activities prior to i/q</b> | M (SD); N<br>Mdn (IQR) | 30.00 (10.90); 35<br>31.00 (23.00 – 38.00) | 28.04 (11.14); 274<br>29.50 (20.00 – 37.00) | 0.355 <sup>2</sup>       |
| <b>Basic activities prior to i/q</b>         | M (SD)<br>Mdn (IQR)    | 5.37 (5.59); 35<br>4.00 (0.00 – 9.00)      | 5.42 (4.86); 274<br>4.00 (1.00 – 9.00)      | 0.618 <sup>2</sup>       |
| <b>Global PDI prior to i/q</b>               | M (SD); N<br>Mdn (IQR) | 35.37 (15.12); 35<br>36.00 (24.00 – 46.00) | 33.46 (14.26); 278<br>34.00 (23.00 – 43.00) | 0.582 <sup>2</sup>       |
| <b>Current family activities</b>             | M (SD); N<br>Mdn (IQR) | 3.00 (1.73); 5<br>2.00 (2.00 – 3.00)       | 5.35 (2.69); 277<br>5.00 (3.00 – 8.00)      | <b>0.041<sup>2</sup></b> |
| <b>Current recreational activities</b>       | M (SD); N<br>Mdn (IQR) | 2.40 (2.07); 5<br>2.00 (1.00 – 4.00)       | 5.37 (2.89); 277<br>6.00 (3.00 – 8.00)      | <b>0.024<sup>2</sup></b> |
| <b>Current social activities</b>             | M (SD); N<br>Mdn (IQR) | 3.00 (3.94); 5<br>1.00 (0.00 – 5.00)       | 4.52 (3.43); 276<br>5.00 (1.00 – 8.00)      | 0.324 <sup>2</sup>       |
| <b>Current occupational activities</b>       | M (SD); N<br>Mdn (IQR) | 1.80 (2.05); 5<br>1.00 (0.00 – 4.00)       | 5.34 (3.25); 276<br>5.00 (3.00 – 8.00)      | 0.019 <sup>2</sup>       |
| <b>Current sexuality</b>                     | M (SD); N<br>Mdn (IQR) | 5.50 (4.80); 4<br>6.00 (1.50 – 9.50)       | 5.52 (3.48); 274<br>6.00 (3.00 – 9.00)      | 0.960 <sup>2</sup>       |
| <b>Current self-care</b>                     | M (SD); N<br>Mdn (IQR) | 1.00 (1.41); 5<br>0.00 (0.00 – 1.00)       | 2.86 (2.85); 277<br>2.00 (0.00 – 5.00)      | 0.130 <sup>2</sup>       |
| <b>Current life support</b>                  | M (SD); N<br>Mdn (IQR) | 0.80 (1.30); 5<br>1.00 (0.00 – 1.00)       | 2.70 (2.78); 277<br>2.00 (0.00 – 5.00)      | 0.113 <sup>2</sup>       |
| <b>Current discretionary activities</b>      | M (SD); N<br>Mdn (IQR) | 17.00 (12.73); 4<br>18.50 (6.50 – 27.50)   | 26.18 (12.51); 273<br>27.00 (16.00 – 36.00) | 0.163 <sup>2</sup>       |
| <b>Current basic activities</b>              | M (SD); N<br>Mdn (IQR) | 2.00 (2.83); 4<br>1.00 (0.00 – 4.00)       | 5.61 (5.12); 273<br>5.00 (1.00 – 9.00)      | 0.130 <sup>2</sup>       |
| <b>Current global PDI</b>                    | M (SD); N<br>Mdn (IQR) | 19.00 (14.90); 4<br>21.00 (6.50 – 31.50)   | 31.79 (15.79); 273<br>32.00 (19.00 – 43.00) | 0.124 <sup>2</sup>       |
| <b>Mental outcomes</b>                       |                        |                                            |                                             |                          |
| <b>PHQ-2</b>                                 | M (SD); N<br>Mdn (IQR) | 0.00 (0.00); 2<br>0.00 (0.00 – 0.00)       | 2.85 (1.68); 272<br>2.00 (2.00 – 4.00)      | <b>0.017<sup>2</sup></b> |
| <b>GAD-2</b>                                 | M (SD); N<br>Mdn (IQR) | 0.50 (0.71); 2<br>0.50 (0.00 – 1.00)       | 2.90 (1.82); 272<br>2.00 (2.00 – 4.00)      | <b>0.044<sup>2</sup></b> |
| <b>PHQ-4</b>                                 | M (SD); N<br>Mdn (IQR) | 0.50 (0.71); 2<br>0.50 (0.00 – 1.00)       | 5.75 (3.19); 272<br>5.00 (3.00 – 8.00)      | <b>0.020<sup>2</sup></b> |
| <b>Resilience (BRS)</b>                      | M (SD); N<br>Mdn (IQR) | 2.66 (1.45); 3<br>3.33 (1.00 – 3.66)       | 2.75 (0.82); 270<br>2.66 (2.16 – 3.33)      | 0.837 <sup>2</sup>       |

BRS= brief resilience score; GAD-2= Generalized Anxiety Disorder Scale; PHQ-2= Patient Health Questionnaire for Depression; PHQ-4= Patient Health Questionnaire for Depression and Anxiety; i/q=isolation or quarantine; d= days; N= Number of women for which data were available; n= sample size; M=mean; SD= standard deviation, Mdn= median; IQR: Interquartile Range; n.a.= not available/not applicable; y=years, Values in bold indicate statistical significance, as the level of statistical significance was set to  $p < 0.05$  (<sup>1</sup>= $\chi^2$ -test; <sup>2</sup>=Mann-Whitney-U-test; <sup>3</sup>=Fisher exact test).

**Table S2. Influence of demographic factors on the intake of OTC and PO analgesics (univariate logistic regression analysis).**

| Increased intake in OTC pain medication                                   |                        | Increased intake in PO pain medication |                        |
|---------------------------------------------------------------------------|------------------------|----------------------------------------|------------------------|
| p-value                                                                   | OR<br>(95% CI)         | p-value                                | OR<br>(95% CI)         |
| <b>Age</b> (in years)                                                     |                        |                                        |                        |
| 0.078                                                                     | 0.958<br>(0.913–1.005) | 0.270                                  | 1.025<br>(0.981–1.072) |
| <b>Having a partner</b> (co: not having a partner)                        |                        |                                        |                        |
| 0.475                                                                     | 0.741<br>(0.325–1.689) | 0.534                                  | 0.769<br>(0.337–1.757) |
| <b>Living alone</b> (co: not living alone)                                |                        |                                        |                        |
| 0.775                                                                     | 0.886<br>(0.386–2.033) | 0.508                                  | 0.745<br>(0.312–1.779) |
| <b>Tertiary educational level</b> (co: up to secondary educational level) |                        |                                        |                        |
| 0.119                                                                     | 1.919<br>(0.845–4.359) | 0.061                                  | 0.526<br>(0.269–1.029) |

OTC = over-the-counter; PO = prescription only; OR = odds ratio; CI = confidence interval; co = controls.
